# Supplementary material for: Going rogue: what scientists can learn about Twitter communication from “alt” government accounts
Source: PeerJ journal article supplement (doi:10.7717/peerj.12407), 2021-11-02
Supplement: Table_S1.pdf [file Table_S1.pdf]

**Appendix 1:** All accounts associated with U.S. federal agencies or organizations, officially or unofficially, with total number of tweets (including retweets), followings, followers, and likes.

| Agency                 | Account                 | Tweets | Following | Followers | Likes |
|------------------------|-------------------------|--------|-----------|-----------|-------|
| National Park Service  | <b>@NatlParkService</b> | 7870   | 2699      | 433856    | 3853  |
|                        | <i>@NotAltWorld</i>     | 502    | 229       | 1328031   | 60    |
|                        | @realALTNPS             | 19     | 1         | 28470     | 0     |
|                        | <i>@AltNatParkSer</i>   | 156    | 60        | 88820     | 20    |
|                        | @ALTUSNPS               | 362    | 194       | 20970     | 3763  |
|                        | @altnps                 | 560    | 75        | 10692     | 0     |
|                        | @Rogue_NPS              | 89     | 53        | 7314      | 23    |
| Alaska Region          | <b>@AlaskaNPS</b>       | 3198   | 543       | 36578     | 387   |
|                        | @AltNPSAlaska           | 688    | 94        | 5571      | 974   |
| Badlands               | <b>@BadlandsNPS</b>     | 3793   | 1695      | 234566    | 14518 |
|                        | @AltBadlandsPark        | 117    | 100       | 28322     | 25    |
|                        | @AltBadlandsNPS         | 542    | 2812      | 29677     | 2136  |
|                        | <i>@BadHombreNPS</i>    | 1193   | 324       | 208629    | 10.6  |
|                        | @BadHombresNPS          | 69     | 378       | 12988     | 435   |
|                        | @BadlandsNPSFans        | 33     | 3         | 111382    | 7     |
|                        | @badasslandsUSA         | 153    | 476       | 1579      | 133   |
| Big Bend               | @BadlandsGonWild        | 60     | 0         | 4644      | 25    |
|                        | <b>@BigBendNPS</b>      | 542    | 118       | 6706      | 483   |
| Biscayne               | @AltBigBendNP           | 88     | 103       | 676       | 320   |
|                        | <b>@BiscayneNPS</b>     | 2259   | 274       | 12445     | 641   |
| Crater Lake            | @AltBiscayneNPS         | 405    | 278       | 1612      | 274   |
|                        | <b>@CraterLakeNPS</b>   | 2183   | 127       | 29031     | 0     |
| Dry Tortugas           | @AltCraterLakeNP        | 81     | 104       | 17470     | 16    |
|                        | @AltCraterLake          | 5      | 33        | 698       | 5     |
|                        | <b>@DryTortugasNPS</b>  | 739    | 389       | 13103     | 895   |
| Everglades             | @AltTortugasNPS         | 178    | 40        | 1721      | 31    |
|                        | <b>@EvergladesNPS</b>   | 1953   | 318       | 21421     | 1378  |
| Glacier                | @AltEverglades          | 157    | 522       | 1958      | 1     |
|                        | <b>@glaciernps</b>      | 2920   | 259       | 193464    | 766   |
|                        | @AltGlacierNPS          | 224    | 74        | 39095     | 43    |
| Homestead Mmmt         | @GlacierNPSAlt          | 237    | 681       | 28310     | 184   |
|                        | <b>@HomesteadNM</b>     | 2966   | 679       | 11750     | 84    |
| Hoover Historical Site | @AltHomesteadMon        | 1292   | 231       | 6335      | 428   |
|                        | <b>@HooverNPS</b>       | 329    | 328       | 10432     | 11    |
| Hot Springs            | @AltHooverNPS           | 811    | 62        | 20699     | 277   |
|                        | <b>@VisitHotSprings</b> | 1787   | 314       | 3584      | 215   |
|                        | @TheRogueArkie          | 513    | 91        | 31231     | 230   |

|                                            |                         |       |        |         |       |
|--------------------------------------------|-------------------------|-------|--------|---------|-------|
| Lassen                                     | <b>@LassenNPS</b>       | 917   | 25     | 26081   | 3     |
|                                            | @AltLassenNPS           | 148   | 1134   | 35647   | 474   |
| Mt Rushmore                                | <b>@MountRushmoreNM</b> | 738   | 799    | 1922    | 270   |
|                                            | @AltRushmore            | 66    | 32     | 1632    | 50    |
| Muir Woods                                 | <b>@MuirWoodsNPS</b>    | 1612  | 469    | 5186    | 507   |
|                                            | @altMuirWoodsNPS        | 175   | 241    | 19626   | 50    |
| Olympic                                    | <b>@OlympicNP</b>       | 740   | 334    | 12025   | 740   |
|                                            | @olympicRogueNPS        | 375   | 237    | 34934   | 983   |
| Pullman Mnmt                               | <b>N/A</b>              |       |        |         |       |
|                                            | @AltPullMonument        | 415   | 483    | 254     | 211   |
| Rainier                                    | <b>@MountRainierNPS</b> | 3709  | 7      | 27923   | 727   |
|                                            | @AltMtRainier           | 1602  | 299    | 68139   | 6461  |
| Rocky Mnt                                  | <b>@RockyNPS</b>        | 12204 | 69     | 27765   | 7     |
|                                            | @AltRockyNPS            | 347   | 73     | 40225   | 158   |
| Saguaro                                    | <b>@SaguaroNPS</b>      | 1879  | 39     | 21972   | 104   |
|                                            | @altSaguaroNPS          | 43    | 1160   | 734     | 29    |
| Volcanoes                                  | <b>@Volcanoes_NPS</b>   | 667   | 547    | 9985    | 694   |
|                                            | @AltHVNP                | 1749  | 595    | 34411   | 4324  |
| Yellowstone                                | <b>@YellowstoneNPS</b>  | 3689  | 377    | 499277  | 1890  |
|                                            | @AltYelloNatPark        | 5443  | 156    | 53187   | 5231  |
| Yosemite                                   | <b>@YosemiteNPS</b>     | 4654  | 12     | 330647  | 78    |
|                                            | @AltYosemite            | 78    | 125    | 70371   | 464   |
|                                            | @YosemiteUprisin        | 178   | 213    | 18795   | 253   |
| Zion                                       | <b>@ZionNPS</b>         | 2356  | 777    | 83794   | 2553  |
|                                            | @alt_nps_zion           | 33    | 8      | 637     | 5     |
| Bureau of Land Management                  | <b>@BLMNational</b>     | 9696  | 1125   | 22681   | 13014 |
|                                            | @blm_alt                | 140   | 160    | 11902   | 69    |
|                                            | @AltBLM                 | 163   | 27     | 1010    | 84    |
| Centers for Disease Control and Prevention | <b>@CDCgov</b>          | 18316 | 271    | 781394  | 266   |
|                                            | @Alt_CDC                | 219   | 217    | 215698  | 96    |
|                                            | @viralCDC               | 228   | 56     | 21908   | 463   |
| Department of the Interior                 | <b>@Interior</b>        | 15589 | 229086 | 2924739 | 2637  |
|                                            | @InteriorAlt            | 1581  | 648    | 3502    | 2024  |
| Environmental Protection Agency            | <b>@EPA</b>             | 13415 | 677    | 504072  | 6     |
|                                            | @ActualEPAFacts         | 3595  | 110    | 292649  | 2158  |
|                                            | @altUSEPA               | 4629  | 84     | 388174  | 7251  |
|                                            | @ungaggedEPA            | 564   | 836    | 102682  | 4357  |
|                                            | @EPAWouldSay            | 285   | 107    | 25294   | 266   |
|                                            | @RogueEPASTAFF          | 2718  | 959    | 3782    | 1666  |
|                                            | @RogueUSEPA             | 168   | 31     | 9853    | 35    |
|                                            | @Uncensored_EPA         | 126   | 73     | 1299    | 24    |
|                                            | @TheAltEPA              | 721   | 514    | 10787   | 1064  |

|                                                 |                 |       |      |          |      |
|-------------------------------------------------|-----------------|-------|------|----------|------|
|                                                 | @RealAltUSEPA   | 2493  | 949  | 1360     | 2055 |
| Food and Drug Administration                    | @US_FDA         | 6628  | 140  | 160910   | 168  |
|                                                 | @alt_fda        | 802   | 270  | 197508   | 153  |
|                                                 | @rogueUSFDA     | 87    | 22   | 2123     | 101  |
| Health and Human Services                       | @HHSGov         | 13387 | 244  | 664928   | 130  |
|                                                 | @AltHHS         | 261   | 207  | 216669   | 87   |
|                                                 | @RogueHHS       | 4084  | 355  | 1038     | 594  |
| National Aeronautics and Space Administration   | @NASA           | 46448 | 263  | 22592355 | 2381 |
|                                                 | @ResistanceNASA | 197   | 530  | 51758    | 241  |
|                                                 | @RogueNASA      | 1335  | 264  | 899606   | 1093 |
|                                                 | @Alt_NASA       | 536   | 86   | 207329   | 308  |
|                                                 | @TheAltNasa     | 195   | 676  | 709      | 4    |
|                                                 | @aItNASA        | 23    | 65   | 4068     | 0    |
| National Institutes of Health                   | @NIH            | 7087  | 256  | 756915   | 578  |
|                                                 | @Alt_NIH        | 75    | 38   | 219232   | 13   |
|                                                 | @AltNIH         | 16    | 67   | 2443     | 3    |
| National Institute of Standards and Technology  | @usnistgov      | 8380  | 281  | 34273    | 413  |
|                                                 | @alt_NIST       | 209   | 27   | 2011     | 12   |
| National Oceanic and Atmospheric Administration | @NOAA           | 10063 | 117  | 826777   | 16   |
|                                                 | @RogueNOAA      | 41    | 17   | 53415    | 0    |
|                                                 | @altNOAA        | 2208  | 250  | 146434   | 784  |
|                                                 | @noaagov        | 31    | 31   | 27175    | 3    |
| National Marine Fisheries Service               | @NOAAFisheries  | 5858  | 409  | 37076    | 32   |
|                                                 | @AltNMFS        | 350   | 33   | 868      | 9    |
| National Science Foundation                     | @NSF            | 16380 | 98   | 1034752  | 3561 |
|                                                 | @Rogue_NSF      | 146   | 110  | 9088     | 13   |
|                                                 | @ALT_NSF        | 28    | 84   | 2457     | 88   |
|                                                 | @AltNatSciFdn   | 0     | 34   | 10       | 0    |
| Smithsonian Institution                         | @smithsonian    | 16902 | 207  | 2530667  | 1023 |
|                                                 | @AltSmithsonian | 1157  | 285  | 24283    | 1065 |
| Arctic Research Commission                      | @US_ARC         | 6970  | 13   | 4114     |      |
|                                                 | @AltUS_ARC      | 139   | 33   | 57490    | 11   |
| Board on Geographic Names                       | N/A             | N/A   | N/A  | N/A      | N/A  |
|                                                 | @Rogue_USBGN    | 0     | 0    | 9        | 0    |
|                                                 | @Rogue_Sci      | 122   | 46   | 55067    | 29   |
| Department of Agriculture                       | @USDA           | 12101 | 2027 | 535671   | 95   |
|                                                 | @USDA_alt       | 120   | 99   | 10835    | 45   |
|                                                 | @altusda        | 1634  | 25   | 258361   | 5047 |
| Agricultural Research Service                   | @USDA_ARS       | 3022  | 191  | 13655    | 225  |
|                                                 | @AltUSDA_ARS    | 5046  | 513  | 19568    | 2477 |
| Forest Service                                  | @forestsERVICE  | 21178 | 1901 | 123691   | 502  |

|                                                        |                  |       |       |         |       |
|--------------------------------------------------------|------------------|-------|-------|---------|-------|
|                                                        | @AltForestServ   | 282   | 188   | 338555  | 83    |
| Fish and Wildlife Service                              | @USFWS           | 13463 | 48967 | 183653  | 28456 |
|                                                        | @AltUSFWSRefuge  | 744   | 56    | 41411   | 645   |
|                                                        | @AltUSFWS        | 5530  | 504   | 74710   | 798   |
|                                                        | @AlternateUSFW   | 684   | 357   | 19615   | 859   |
| Geologic Survey                                        | @USGS            | 13850 | 90    | 653303  | 871   |
|                                                        | @Alt_USGS        | 94    | 226   | 333     | 129   |
| Combination Alt Accounts                               | @altNPSandEPA    | 69    | 51    | 32608   | 31    |
|                                                        | @NastyWomenofNPS | 1493  | 521   | 12669   | 1766  |
|                                                        | @AngryNatlPark   | 1767  | 190   | 29395   | 567   |
|                                                        | @ClimateNPS      | 275   | 232   | 29796   | 289   |
|                                                        | @BowlingGreenNPS | 133   | 92    | 1838    | 470   |
|                                                        | @YellerstoneNPS  | 414   | 265   | 6480    | 395   |
|                                                        | @MordorNPS       | 384   | 352   | 16112   | 649   |
|                                                        | @SubversivRanger | 3234  | 2656  | 1123    | 601   |
| <hr/>                                                  |                  |       |       |         |       |
| <u>Non-Science</u>                                     |                  |       |       |         |       |
| AmeriCorps                                             | @AmeriCorps      | 8304  | 802   | 55962   | 6315  |
|                                                        | @AltAmeriCorps   | 237   | 987   | 1147    | 363   |
| American Library Association                           | @ALALibrary      | 16360 | 6299  | 144944  | 2037  |
|                                                        | @rogue_ALA       | 233   | 363   | 7326    | 1716  |
| Bureau of Alcohol, Tobacco,<br>Firearms and Explosives | @ATFHQ           | 5315  | 3505  | 37495   | 920   |
|                                                        | @Rogue_ATF       | 1     | 23    | 502     | 0     |
| Armed Forces                                           | @USArmy          | 26981 | 513   | 1041092 | 1251  |
|                                                        | @AltArmedForces  | 110   | 25    | 271     | 11    |
| Department of Energy                                   | @ENERGY          | 13417 | 505   | 638029  | 2254  |
|                                                        | @realUSDOE       | 43    | 52    | 19308   | 32    |
|                                                        | @AltDofEnergy    | 1     | 2     | 17377   | 0     |
| Department of Labor                                    | @USDOL           | 19261 | 542   | 373129  | 2579  |
|                                                        | @alt_labor       | 5521  | 781   | 62308   | 10649 |
| Department of Education                                | @usedgov         | 20209 | 170   | 1171535 | 1974  |
|                                                        | @RogueED         | 3364  | 326   | 9722    | 3246  |
|                                                        | @Alt_DeptofED    | 1202  | 93    | 131656  | 1046  |
|                                                        | @AltDptEducation | 3828  | 156   | 28547   | 4786  |
| Drug Information Association                           | @DefenseIntel    | 1397  | 82    | 102357  | 368   |
|                                                        | @AltDIA          | 1162  | 57    | 26577   | 3244  |
| Department of Transportation                           | @USDOT           | 5290  | 1198  | 159599  | 686   |
|                                                        | @altDMV          | 156   | 70    | 2319    | 43    |
| Department of Defense                                  | @DeptofDefense   | 17196 | 980   | 4003949 | 1319  |
|                                                        | @Rogue_DoD       | 222   | 181   | 32787   | 146   |
| Department of Homeland Security                        | @DHSgov          | 11834 | 368   | 1261077 | 176   |

|                                                          |                  |       |      |          |       |
|----------------------------------------------------------|------------------|-------|------|----------|-------|
|                                                          | @AltHomelandSec  | 2050  | 109  | 65910    | 369   |
| Department of Justice                                    | @TheJusticeDept  | 5717  | 218  | 1292043  | 0     |
|                                                          | @AltUSDOJ        | 360   | 199  | 13252    | 197   |
|                                                          | @AltBJS          | 218   | 4456 | 1777     | 261   |
| Department of State                                      | @StateDept       | 47543 | 401  | 4075264  | 15    |
|                                                          | @AltStateDpt     | 1093  | 35   | 177743   | 465   |
| Department of the Treasury                               | @USTreasury      | 5486  | 247  | 719802   | 210   |
|                                                          | @alt_treasury    | 5     | 30   | 67283    | 0     |
| Department of Veterans Affairs                           | @DeptVetAffairs  | 18608 | 879  | 505505   | 1007  |
|                                                          | @AltDept_of_VA   | 1210  | 266  | 3132     | 589   |
| Federal Bureau of Investigation                          | @FBI             | 9488  | 2189 | 1895029  | 0     |
|                                                          | @altFBI          | 767   | 87   | 59813    | 35    |
| Federal Election Commission                              | @FEC             | 977   | 1    | 8989     | 4     |
|                                                          | @alt_fec         | 953   | 101  | 31284    | 504   |
| Federal Emergency Management Agency                      | @fema            | 12121 | 638  | 581886   | 1745  |
|                                                          | @rogueFEMA       | 542   | 245  | 41063    | 371   |
| House Committee on Science, Space, and Technology        | @HouseScience    | 2447  | 319  | 181793   | 177   |
|                                                          | @altHouseScience | 2222  | 113  | 2618     | 50    |
| Department of Housing and Urban Development              | @HUDgov          | 7555  | 348  | 240477   | 61    |
|                                                          | @AltUSDeptHUD    | 154   | 77   | 41602    | 44    |
|                                                          | @HUDFacts        | 76    | 1503 | 11737    | 44    |
| National Education Association                           | @NEAarts         | 68045 | 769  | 88669    | 13076 |
|                                                          | @Alt_NEArts      | 779   | 780  | 9158     | 616   |
| National Endowment for the Humanities                    | @NEHgov          | 14124 | 789  | 25612    | 4070  |
|                                                          | @RogueNEH        | 82    | 256  | 8561     | 126   |
|                                                          | @alt_neh         | 40    | 270  | 2603     | 5     |
| Peace Corps                                              | @PeaceCorps      | 13847 | 382  | 1276812  | 2031  |
|                                                          | @AltPeaceCorps   | 93    | 77   | 1776     | 14    |
| Railroad Retirement Board                                | N/A              | N/A   | N/A  | N/A      | N/A   |
|                                                          | @RogueRRB        | 1059  | 99   | 6927     | 7     |
| Agency for International Development                     | @USAID           | 23863 | 657  | 629487   | 1258  |
|                                                          | @Alt_USAID       | 113   | 42   | 2831     | 12    |
| Citizenship and Immigration Services                     | @USCIS           | 9966  | 109  | 94563    | 93    |
|                                                          | @ALT_USCIS       | 11733 | 192  | 32673    | 1     |
| Refugee, Asylum and International Operations Directorate | N/A              | N/A   | N/A  | N/A      | N/A   |
|                                                          | @AltRAIO         | 564   | 355  | 3553     | 35    |
|                                                          | @ALT_RAIO_USCIS  | 4     | 640  | 135      | 0     |
| The White House                                          | @WhiteHouse      | 356   | 11   | 14136901 | 8     |
|                                                          | @RoguePOTUSStaff | 2242  | 44   | 847809   | 231   |

Press Secretary

|                   |      |     |         |     |
|-------------------|------|-----|---------|-----|
| @alt_Trump_WH     | 136  | 77  | 326     | 1   |
| @AltWhitehouseIT  | 1041 | 207 | 2273    | 300 |
| @WHLeaks          | 3    | 37  | 148     | 0   |
| @AltWhtHouse      | 88   | 58  | 260     | 0   |
| @white_house_alt  | 31   | 31  | 30      | 30  |
| @Alt_WhiteHouse_  | 74   | 34  | 39      | 0   |
| @RogueSNRadvisor  | 421  | 39  | 67535   | 22  |
| @AltEEOB          | 2182 | 192 | 8023    | 103 |
| @ <b>PressSec</b> | 343  | 39  | 1776826 | 41  |
| @AltUSPressSec    | 8830 | 659 | 16945   | 506 |
